# Supplementary material for: Effects of perioperative intravenous esketamine on postoperative recovery quality in adult patients: a systematic review and meta-analysis
Source: PeerJ journal article supplement (doi:10.7717/peerj.19977), 2025-09-16
Supplement: Supplemental_material.docx [file Supplemental_material.docx]

**Search strategy**

**PubMed**

#1 Esketamine[Supplementary Concept]

#2 S-ketamine[Title/Abstract]

#3 #1-2/OR

#4 pain[Title/Abstract]

#5 analgesia[Title/Abstract]

#6 opioid[Title/Abstract]

#7 #4-6/OR

#8 postoperative[Title/Abstract]

#9 recovery quality[Title/Abstract]

#10 QoR[Title/Abstract]

#11 #8-10/OR

#12 #3 7 11/AND

**EMBASE**

#1 ’esketamine’/exp

#2 ’s ketamine’:ti,ab,kw

#3 ‘pain’:ti,ab,kw

#4 ‘analgesia’:ti,ab,kw

#5 ‘opioid’:ti,ab,kw

#6 ‘postoperative’:ti,ab,kw

#7‘recovery quality’:ti,ab,kw

#8 ‘QoR’:ti,ab,kw

#9 #1-2/OR

#10 #3-5/OR

#11 #6-8/OR

#12 #9-11/AND

**Web of Science**

#1 TS=(Esketamine OR S-ketamine)

#2 TS=(Pain OR Analgesia OR Opioid)

#3 TS=(Postoperative OR Recovery quality OR QoR)

#4 #1 AND #2 AND #3

**the Cochrane library**

#1 esketamine:ti,ab,kw

#2 s-ketamine:ti,ab,kw

#3 pain:ti,ab,kw

#4 analgesia:ti,ab,kw

#5 opioid:ti,ab,kw

#6 postoperative:ti,ab,kw

#7 Recovery quality:ti,ab,kw

#8 QoR:ti,ab,kw

#9 #1-2/OR

#10 #3-5/OR

#11 #6-8/OR

#12 #9-11/AND

**China National Knowledge Infrastructure**

<https://www.cnki.net/>

keywords used:艾司氯胺酮；疼痛；镇痛；恢复质量；

**Supplemental Table**

**Table 1 Basic characteristics of the included studies**

**Table 2 The GRADE level of certainty for main outcome**


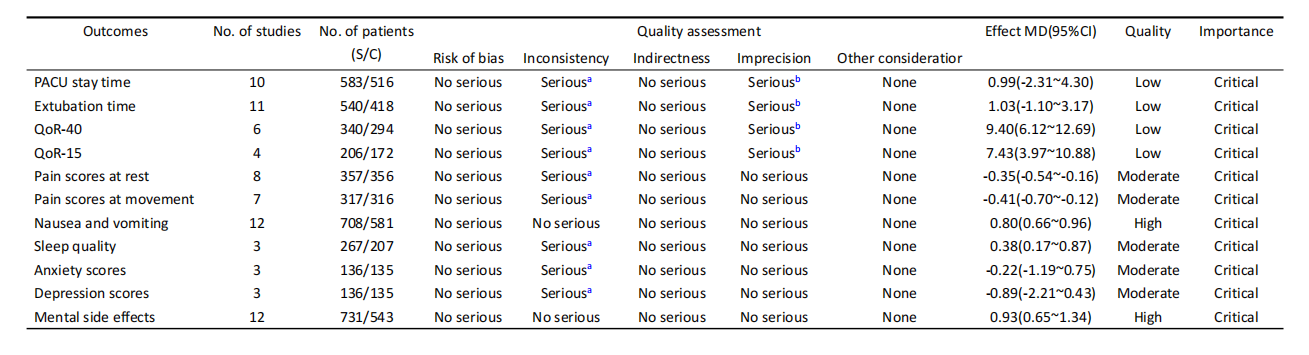


MD：Mean Difference; CI: Confidence Interval

a Quality was rated down for inconsistency because I2 > 50%.

b Quality was rated down for imprecision due to wide 95% CI.

**Supplemental Figure**

Forest plot of secondary outcomes


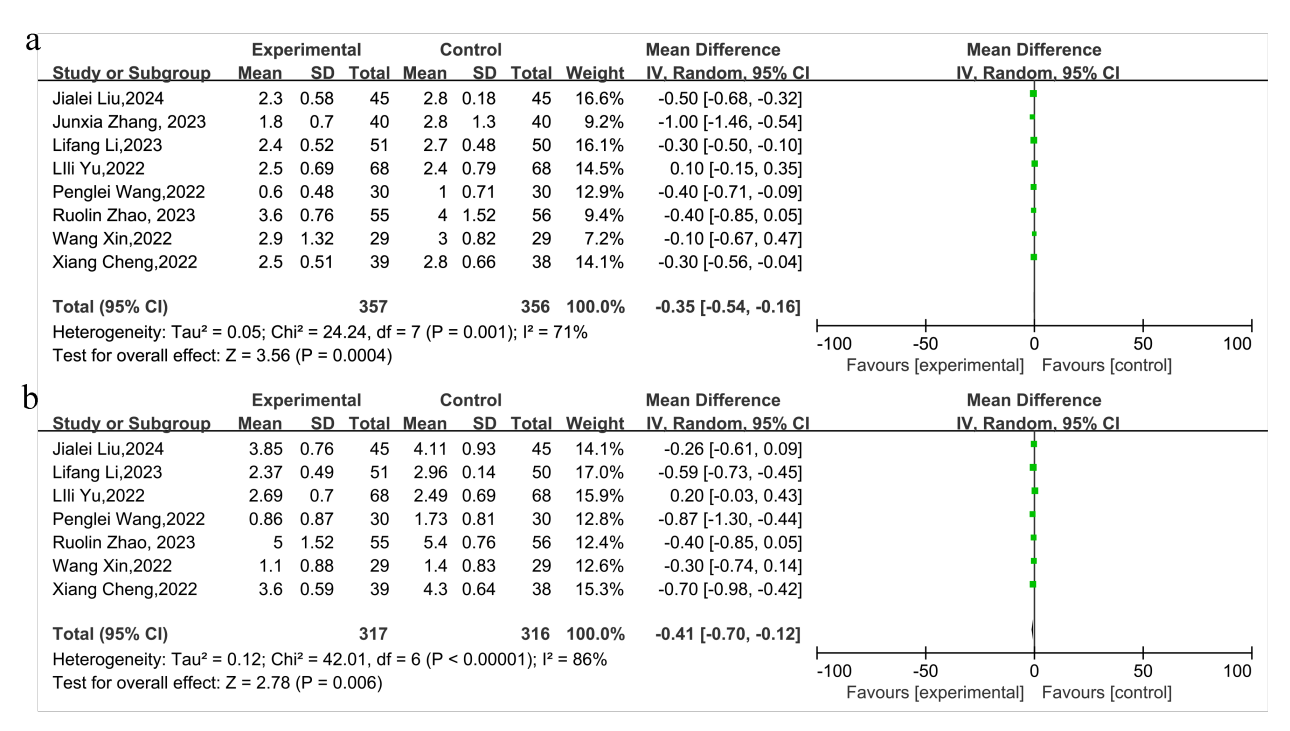


**Supplemental Figure 6. Forest plot of rest and movement pain scores 24h after surgery (a. Rest b. Movement)**

**
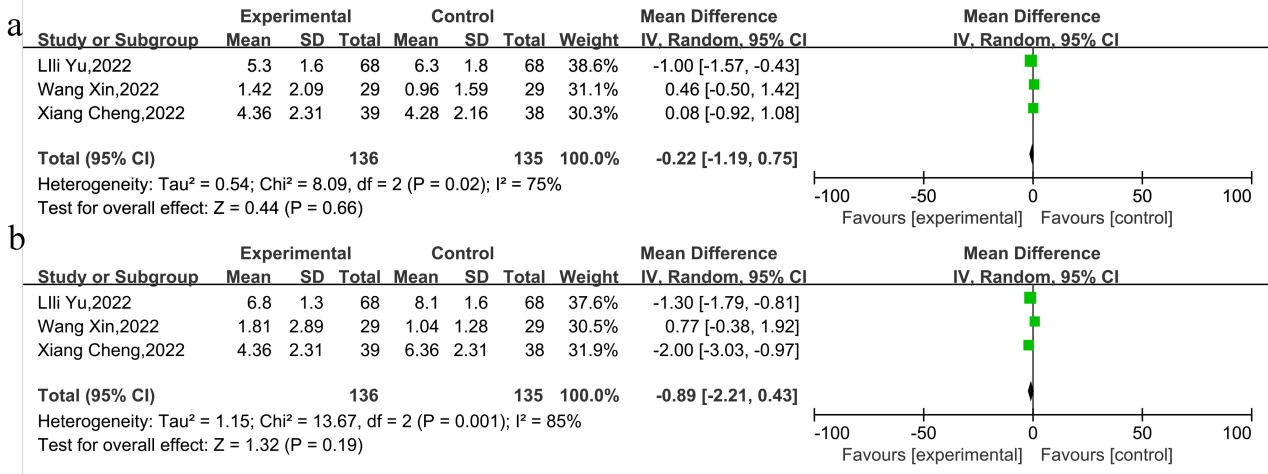
**

**Supplemental Figure 7. Forest plot of postoperative anxiety and depression scores (a. Anxiety b. Depression)**

**
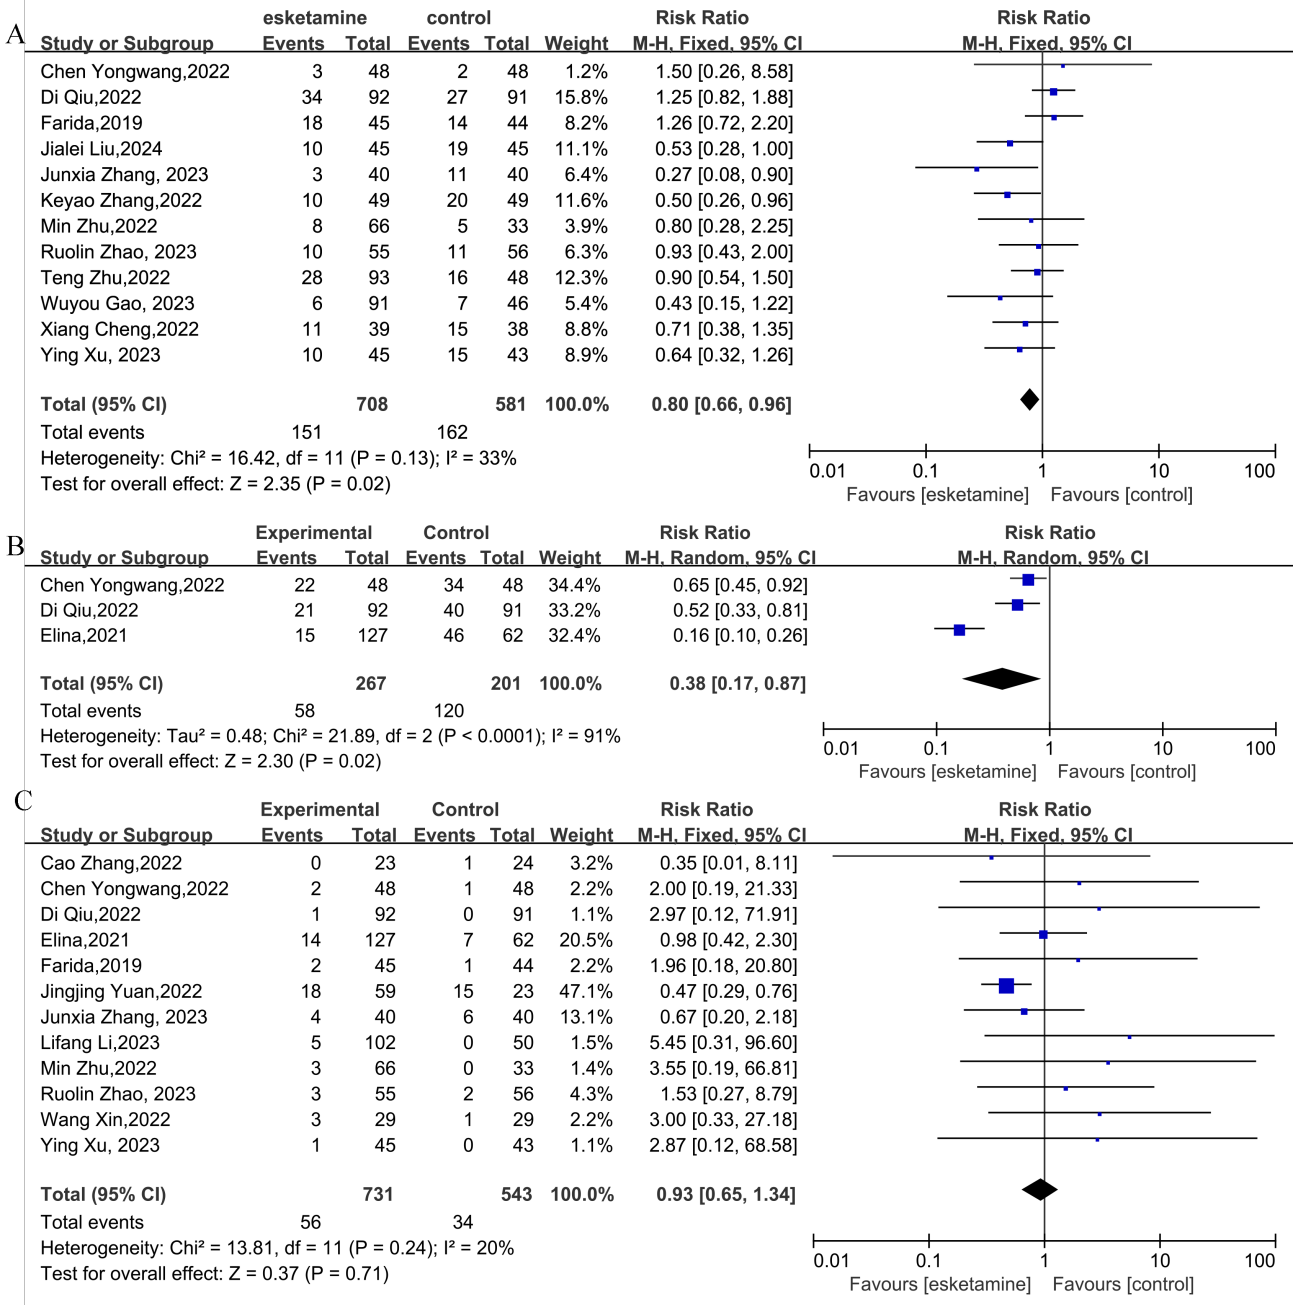
Supplemental Figure 8. A. Forest plot of postoperative incidence of nausea and vomiting**

**B. Forest plot of insomnia rate**

**C. Forest plot of the incidence of mental side effects**
